# Supplementary material for: Association between institutionalization by 4 months post-discharge walking capacity and lean body mass in elderly hip fracture patients: Evidence from a Swedish Registry Based Study
Source: PubMed Central journal article supplement — SAGE Open Med. 2024 Jun 13;12:20503121241258409. doi: 10.1177/20503121241258409 (PMC11179511; doi:10.1177/20503121241258409), 2024-06-13
Supplement: sj-pdf-2-smo-10.1177_20503121241258409.pdf [file sj-pdf-2-smo-10.1177_20503121241258409.pdf]

Standardised  
Audit of  
Hip  
Fractures in  
Europe

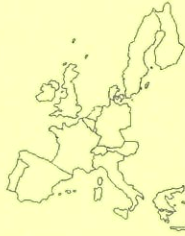

1.  -  **Country and hospital code**  
First 3 numbers are the countries international dialling code, then 6 numbers for the hospital code.
  2.  **Patient ID number**  
Each hospital may chose their own ID number, e.g. social security number, hospital record number.  
Even if the patient is admitted later for a second fracture the same number is used.
  3.  **SAHFE number** (Computer generated when form 1 is registered).
  4.  **Side of fracture** 1=Left 2=Right (If simultaneous bilateral fracture, use 2 forms.)
  5.  /  /  **Date of fracture** (If not known, use "Date of admission", form 1.)
  6.  /  /  **Date of birth** (e.g. 25/06/1945)
  7.  **Sex** 1=Male 2=Female
- 
8.  /  /  **Date of admission**
  9.  **Admitted from** Choose the one option that best applies. For full explanation see on the back of this form.  
1=Own home 2=Sheltered housing 3=Institutional care 4=Nursing home  
5=Permanent hospital inpatient 6=Rehabilitation unit 7=Acute hospital 8=Other 9=Died
  10.  .  **Living alone** (A modification to this is available in the optional section)  
1.0=Yes 2.0=No 3.0=Institutional care (categories 3-7 above)
  11.  **Walking** Refers to the patients normal walking ability immediately before the fracture occurred.  
1=Walked alone out of doors 2=Walked out of doors only if accompanied  
3=Walked alone indoors but not out of doors 4=Walked indoors only if accompanied 5=Unable to walk
  12.  **Walking aids** Refers to the walking aids normally used before the fracture occurred.  
1=Can walk without aids 2=One aid (stick, crutch, tripod or hemiwalker)  
3=Two aids (stick, crutch, tripod or hemiwalker) 4=Frame (walking frame or rollator) 5=Wheelchair/bedbound
  13.  **ASA grade**  
1=Completely fit and healthy, 2=Some illness but this has no effect on normal daily activity, that is an asymptomatic condition such as hypertension, 3=Symptomatic illness present, but minimal restriction on life, e.g. mild diabetes mellitus, 4=Symptomatic illness causing severe restriction, e.g. severe chronic bronchitis, unstable diabetes, 5=Moribund.
  14.  **Type of fracture** (see figure on the back of this form)  
Choose the area of bone in which the main fracture line crossing femur is predominately found.  
1=Undisplaced intracapsular 2=Displaced intracapsular 3=Basocervical  
4=Trochanteric two fragments 5=Trochanteric multi-fragments 6=Subtrochanteric (any number of fragments)
  15.  **Pathological fracture**  
1=No 2=Malignant secondary bone tumor 3=Malignant primary bone tumor  
4=Bone cyst 5=Paget's disease 6=Other (specify)
  16.  /  /  **Date of operation** Leave blank only if not operated on.
  17.  .  **Primary operation** (A modification to this is available in the optional section)  
1=Single screw, pin or nail 2=Two screws, pins or nails 3=Three or more screws, pins or nails  
4=Single screw, pin or nail with side plate 5=Intramedullary nail 6=Hemiarthroplasty  
7=Total hip arthroplasty 8=Conservative 9=Other (specify)
  18.  /  /  **Date of discharge or death from primary admission ward**  
Has any re-operation been performed? If yes, complete form 3 (questions 28-34) for each re-operation
  19.  **Discharged to** (code as question 9)
